# Supplementary material for: Hierarchically porous TiO2/SiO2 fibers with enhanced photocatalytic activity
Source: Royal Society of Chemistry journal article supplement (doi:10.1039/c4ra02285h), 2014-01-01
Supplement: c4ra02285h1.pdf [file c4ra02285h1.pdf]

**Electronic Supplementary Information**

**Hierarchically Porous TiO<sub>2</sub>/SiO<sub>2</sub> Fibers with Enhanced Photocatalytic  
Activity**

*Huilin Hou<sup>a,b</sup>, Lin Wang<sup>b</sup>, Fengmei Gao<sup>b</sup>, Guodong Wei<sup>b</sup>, Jinju Zheng<sup>b</sup>, Bin Tang<sup>a,\*</sup> and  
Weiyu Yang<sup>b,\*</sup>*

<sup>a</sup>Research Institute of Surface Engineering, Taiyuan University of Technology, Taiyuan City, 030024,  
P.R. China.

<sup>b</sup>Institute of Materials, Ningbo University of Technology, Ningbo City, 315016, P.R. China.

**Corresponding Author E-mails:** tangbin@tyut.edu.cn (B. Tang)

weiyuyang@tsinghua.org.cn (W. Yang)

**Tel:** +86-574-87080966

**Fax:** +86-574-87081221

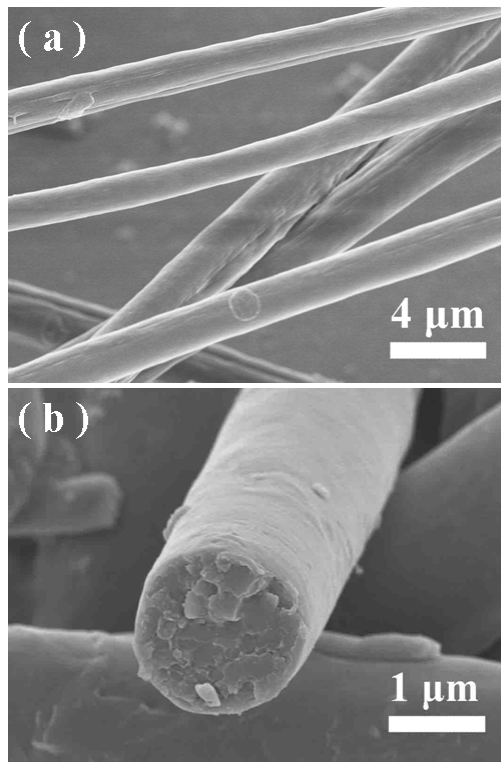

**Fig. S1** Representative SEM images of the electrospun PSN/PVP/TBOT polymer precursor fibers under different magnifications.

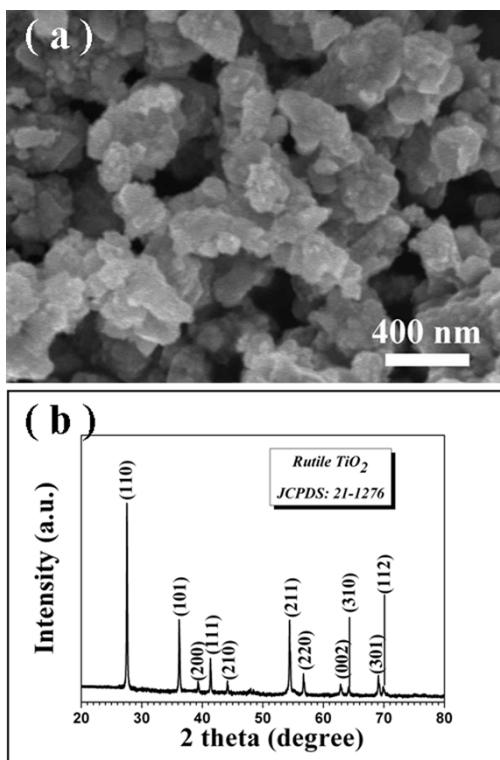

**Fig. S2** (a) A representative SEM images of the TiO<sub>2</sub> nanoparticles prepared via sol-gel method. (b) A typical XRD pattern of the TiO<sub>2</sub> nanoparticles.

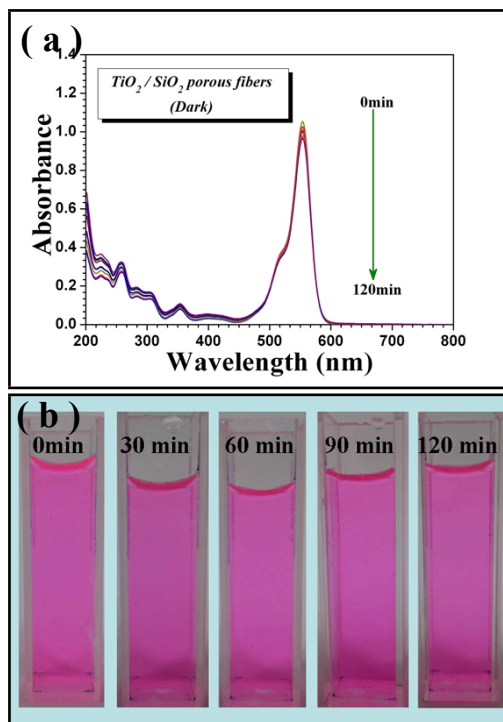

**Fig. S3** (a) Temporal UV-visible adsorption spectra of RhB solution over  $\text{TiO}_2/\text{SiO}_2$  porous fibers in dark. (b) The corresponding digital pictures of the color changes in dark.

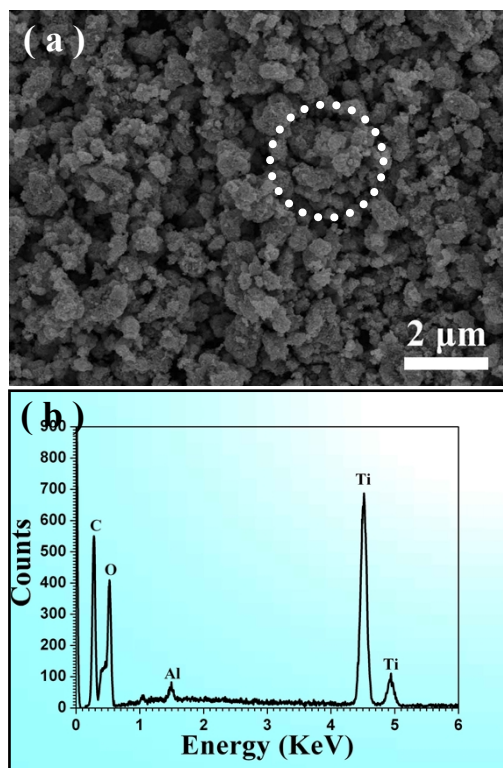

**Fig. S4** (a) A representative SEM image of P25. (b) The corresponding EDS spectrum recorded from the marked area in (a).

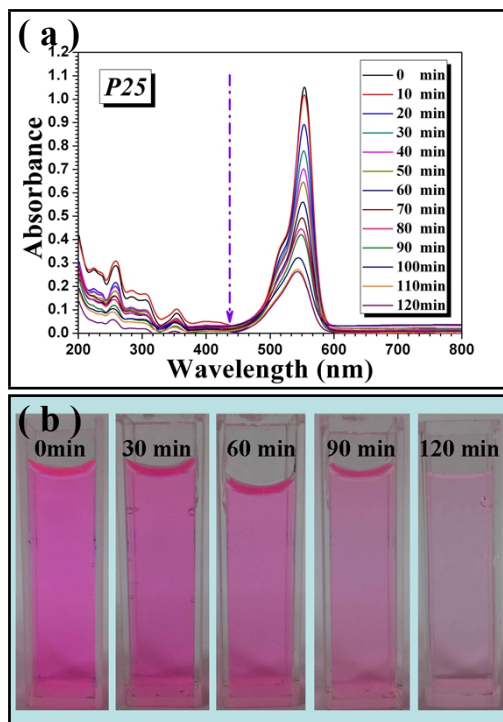

**Fig. S5** (a) Temporal UV-visible adsorption spectra of the RhB solution with the irradiation time over P25. (b) The corresponding digital pictures of the color changes with the irradiation time of P25.
